# Supplementary material for: Cxcl14 depletion accelerates skeletal myogenesis by promoting cell cycle withdrawal
Source: PubMed Central journal article supplement (PMC5537738; doi:10.1038/npjregenmed.2016.17), 2017-01-05
Supplement: NIHMS874280-supplement-supplement_1.pdf [file NIHMS874280-supplement-supplement_1.pdf]

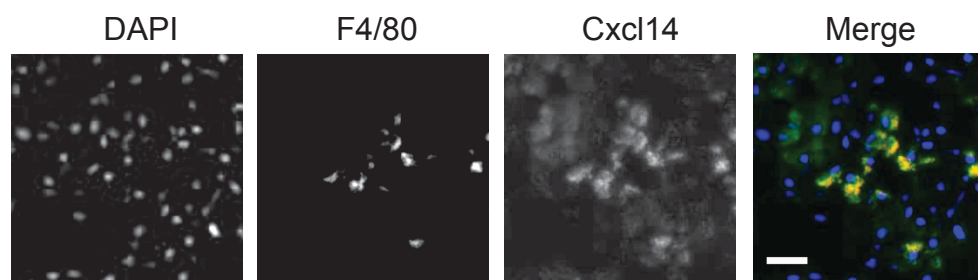

**Fig. S1. Macrophages express Cxcl14**

TA muscles were injured by BaCl<sub>2</sub> injection, isolated on days 3 AI, cryosectioned, and immunostained for Cxcl14 together with F4/80 and DAPI. The merged image was pseudo-colored as follows: DAPI, blue; F4/80, red; Cxcl14, green. n=3. Scale bar: 15 μm.

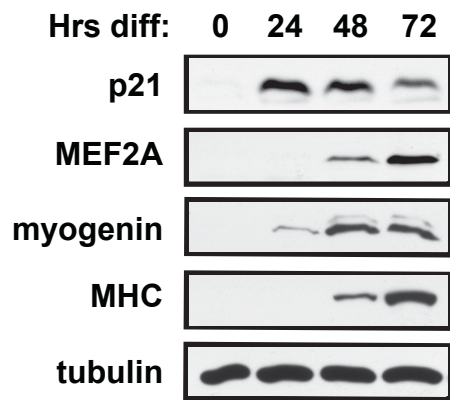

**Fig. S2. Expression of myogenic markers in C2C12 differentiation**

C2C12 myoblasts were induced to differentiate by switching to low-serum medium. At the indicated time points cells were lysed and subjected to western analysis.

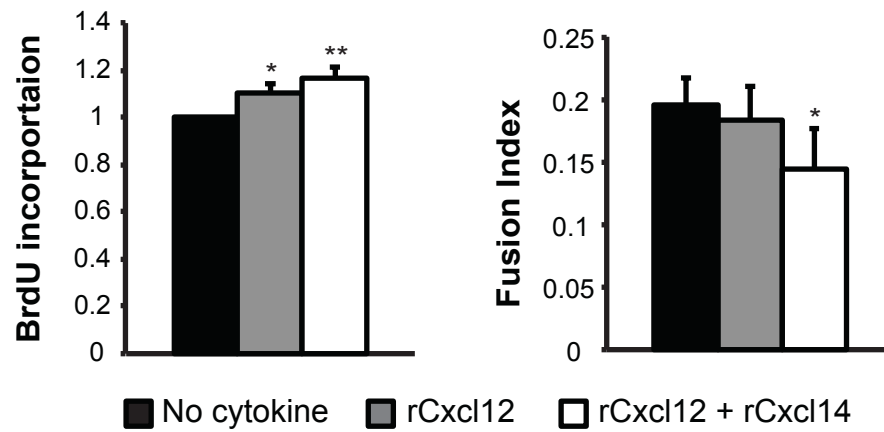

**Fig. S3. Cxcl14 does not antagonize Cxcl12 in the early stage of myogenesis**

C2C12 cells were grown in the presence or absence of rCxcl12 and rCxcl14 for 24 hrs, then differentiated 24 hrs followed by BrdU incorporation (n=3). Alternatively, cells were differentiated for 72 hrs after cytokine exposure and subsequently stained for MHC and with DAPI (n=4). The number of BrdU+ cells and the fusion index were quantified. Paired 2-tailed t test was performed. Different letters indicate statistically significant difference ( $P < 0.05$ ). All error bars represent SD of independent replicates.

**Table S1. Gender of mice does not affect muscle regeneration**

TA muscles of 8-10 week-old female FVB mice were injured with BaCl<sub>2</sub>, and isolated on day 7 AI or day 14 AI (n=5 for each time point). Upon cryosection, H&E staining was performed and regenerating myofiber cross-sectional area (CSA) was quantified. When compared to age-matched male FVB mice (Ge et al., 2009; n=7 for each time point), no significant difference was observed in the regenerating myofiber CSA in females. Paired 2-tailed t test was performed to evaluate statistical significance.

|                           | <b>D7AI (CSA)</b>      |                         | <b>D14AI (CSA)</b>      |                        |
|---------------------------|------------------------|-------------------------|-------------------------|------------------------|
|                           | <b>Males</b>           | <b>Females</b>          | <b>Males</b>            | <b>Females</b>         |
| <b>Mean</b>               | 804 $\mu\text{m}^2$    | 787 $\mu\text{m}^2$     | 1425 $\mu\text{m}^2$    | 1568 $\mu\text{m}^2$   |
| <b>Standard Deviation</b> | +/- 96 $\mu\text{m}^2$ | +/- 165 $\mu\text{m}^2$ | +/- 176 $\mu\text{m}^2$ | +/- 24 $\mu\text{m}^2$ |
| <b>P-value</b>            | 0.92                   |                         | 0.14                    |                        |
